# Supplementary material for: Ecological opportunity and predator–prey interactions: linking eco-evolutionary processes and diversification in adaptive radiations
Source: PubMed Central journal article supplement (PMC5879621; doi:10.1098/rspb.2017.2550), 2018-03-07

2 **SUPPORTING INFORMATION**

3 Ecological opportunity and predator-prey interactions: linking eco-  
4 evolutionary processes and diversification in adaptive radiations

5 Mikael Pontarp<sup>1,2</sup> and Owen L Petchey<sup>1</sup>

6 <sup>1</sup>Department of Evolutionary Biology and Environmental Studies, University of Zurich,  
7 Winterthurerstrasse 190, 8057 Zurich, Switzerland

8 <sup>2</sup> Department of Ecology and Environmental Science, Umeå University, 90187 Umeå, Sweden

9 Article DOI: 10.1098/rspb.[paper ID in form xxxx.xxxx e.g. 10.1098/rspb.2016.0049]

10

## 11 [Appendix 1](#)

12

### 13 [Robustness](#)

14 All the results presented in the main paper are based on radiations with low prey niche width  
15 ( $\sigma_a = 0.1$ ) but quantitatively robust also for wider prey niche width (Appendix 1, figures. S1-  
16 S12) and longer running (5000 evolutionary steps, see examples in figure S13-S15)  
17 simulations. As an additional robustness check, we also simulated radiations with 25%  
18 increase in both parameters  $r$  and  $d$ , a 25 % decrease in  $r$  and  $d$ , and a 25% increase in  $r$  and a  
19 25 % decrease in  $d$  (figures S13-S15). We also inspected the ecological dynamics throughout  
20 the radiations and we see no sign of unstable ecological dynamics throughout our simulations.  
21 Our conclusions presented in the main paper thus remain the same.

22 The simulations are largely deterministic (with some stochastic elements included by random  
23 mutations). We see low variation in prey diversity across 10 replicates, standard deviation  $< 2$   
24 for all  $\sigma_a$ . Variation increases slightly, plausibly due to fewer (5) replicates and increased  
25 community complexity, in the predator-prey simulations. Standard deviation (std) in prey  
26 diversity across replicates in predator-prey simulations is low (std  $< 3$ ) when  $b_{max} = 0.0001$   
27 and then increases when  $b_{max}$  is increased to 0.0003 (std  $< 6$ ) and 0.0005 (std  $< 9$ ). This  
28 increase in variation is however mainly due to increased variation in simulations with low  
29 predator niche width ( $\sigma_a = 0.1$ ), due to predator extinctions in some simulations. Std in  
30 predator diversity were  $>3$  for simulations where  $\sigma_a = 0.3-0.7$ .

31

### 32 [Figure legends](#)

33

#### 34 [Figure S1-S4](#)

35 Predator-prey community adaptive radiation data. Prey diversity as a function of time and  
36 predator niche width (range 0.1(black) – 0.7 (light gray)) for a range of predator mutation

37 probability and efficiency. Dashed line represent a prey reference community and solid lines  
38 denotes predator-prey community data. See panel titles for predator parameter settings. Prey  
39 niche width (denoted as  $\sigma_a$ ) range 0.1 (figure S1); 0.3 (figure S2); 0.5 (figure S3) 0.7 (figure  
40 S4).

41

42 Figure S5-S8

43 Predator-prey community adaptive radiation data. Predator diversity as a function of time and  
44 predator niche width (range 0.1(black) – 0.7 (light gray)) for a range of predator mutation  
45 probability and efficiency. See panel titles for predator parameter settings. Prey niche width  
46 (denoted as  $\sigma_a$ ) range 0.1 (figure S5); 0.3 (figure S6); 0.5 (figure S7) 0.7 (figure S8).

47

48 Figure S9-S12

49 Predator-prey community adaptive radiation data. Mean prey abundance as a function of time  
50 and predator niche width (range 0.1(black) – 0.7 (light gray)) for a range of predator mutation  
51 probability and efficiency. Dashed line represent a prey reference community and solid lines  
52 denotes predator-prey community data. See panel titles for predator parameter settings. Prey  
53 niche width (denoted as  $\sigma_a$ ) range 0.1 (figure S9); 0.3 (figure S10); 0.5 (figure S11) 0.7  
54 (figure S12).

55 Figure S13-S15

56 Predator-prey adaptive radiations across parameter space for different prey growth ( $r$ ) and ( $d$ )  
57 values. Fig. S13 shows results where  $r = 0.75$  and  $d = 0.15$ . Fig. S14 shows results where  $r =$   
58  $1.25$  and  $d = 0.25$ . Fig. S15 shows results where  $r = 1.25$  and  $d = 0.15$ . The general patterns  
59 are similar among these parameter combinations. Co-radiation at intermediate predator niche

60 width ( $\sigma_a = 0.3$ ), low predator mutation probability ( $\mu_{pred} = 0.005$ ) and low (a) and high (b)  
61 predator efficiency ( $b_{max} = 0.0001$  (a) and  $0.0005$  (b)). Predators excluding the prey from parts  
62 of trait space when the predator's efficiency is large ( $b_{max} = 0.0007$ ), niche width is low (e.g.  
63  $\sigma_a < 0.1$ ) and mutation probability is low ( $\mu_{pred} = 0.005$ ) (c). Note that the prey can escape the  
64 excluding affect induced by the predator if a prey mutant invades on the opposite side of the  
65 predator trait (panel c in Fig S13) or if the predator goes extinct (panel c in Fig. S15). High  
66 values of predator mutation probability ( $\mu_{pred} = 0.1$ ), in combination with high predator  
67 efficiency ( $b_{max} = 0.0007$ ) interrupts the branching all together, only one predator and one  
68 prey population co-evolve in trait space with the predator trait (red) completely overlapping  
69 the prey (gray, barely seen) (d). All the results presented is based on radiations with low prey  
70 niche width ( $\sigma_a = 0.1$ ) and other model parameters were set to:  $u_{opt}=0$ ;  $K_{\theta}=10000$ ;  $\sigma_K = 1$ ;  $c =$   
71  $0.3$ ;  $\mu_{prey} = 0.01$ .

72

73

74

75 Figures

76 Figure S1

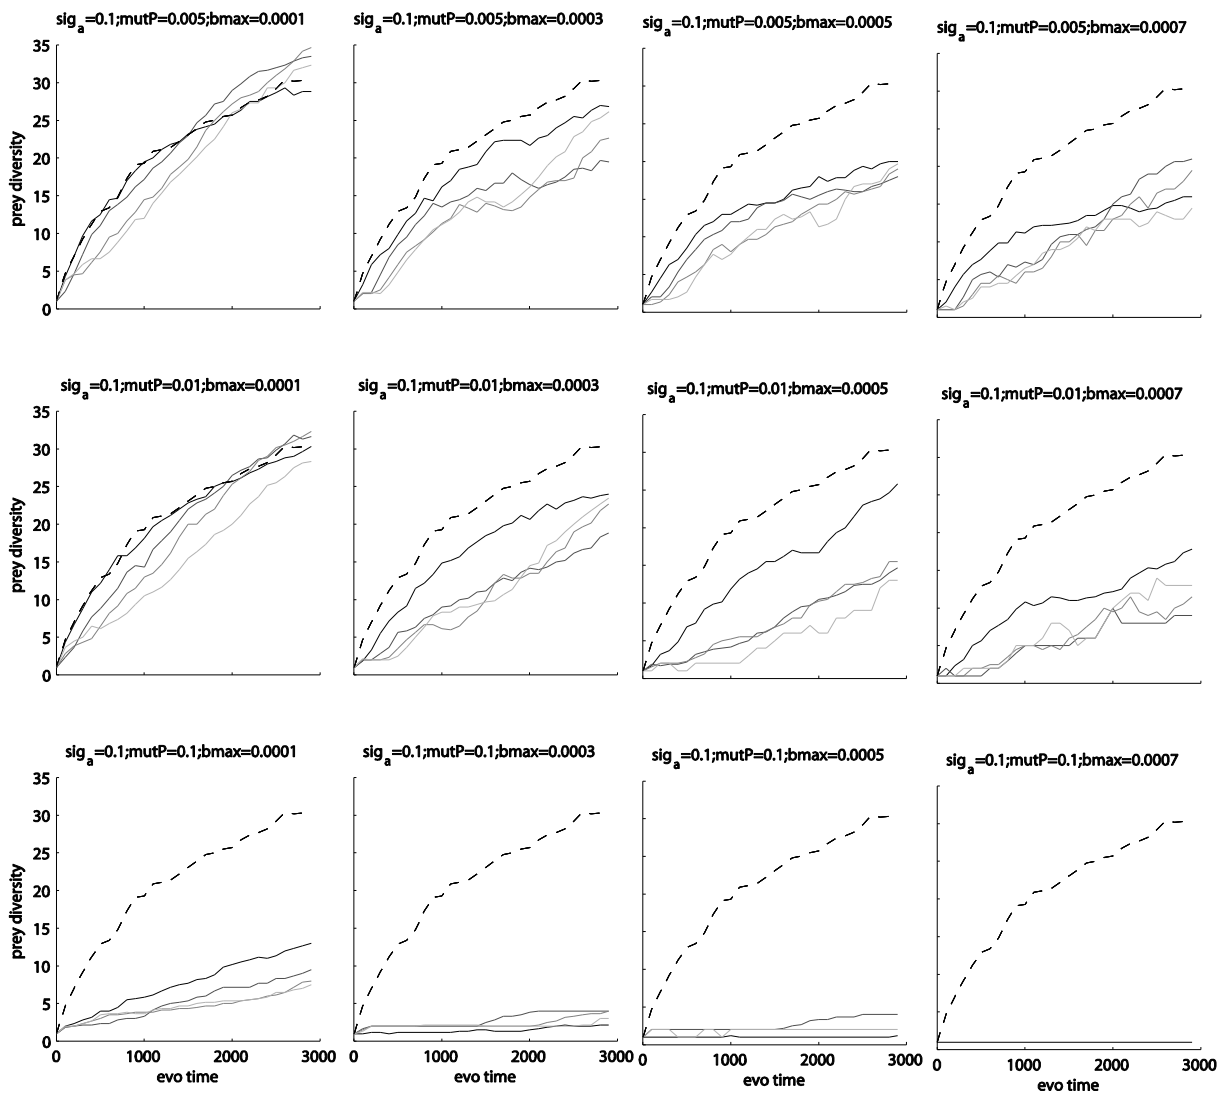

77

78

79

80 Figure S2

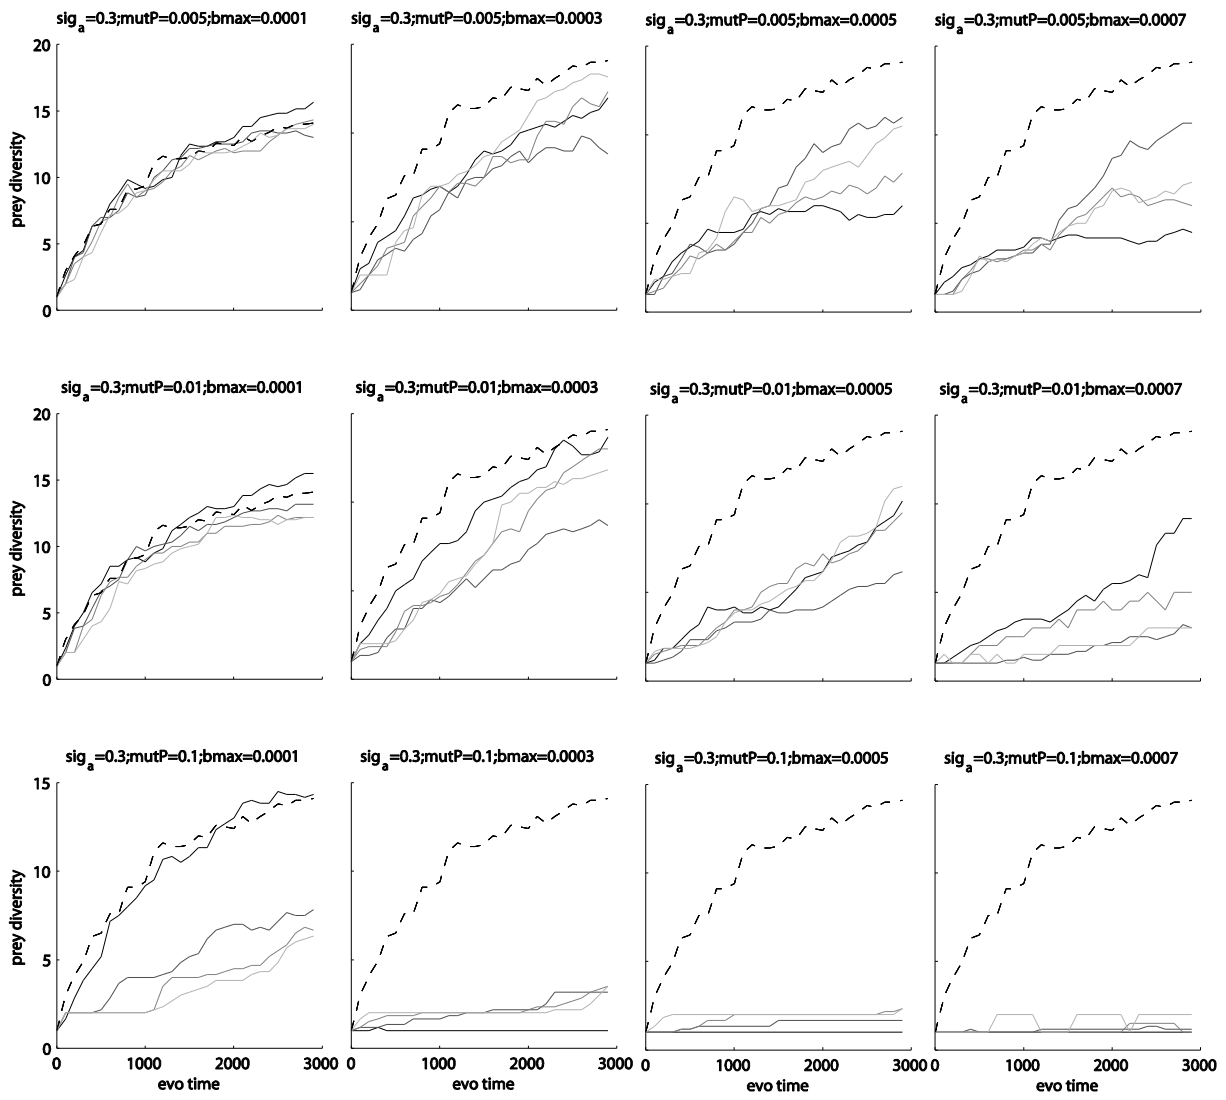

81

82

83

84 Figure S3

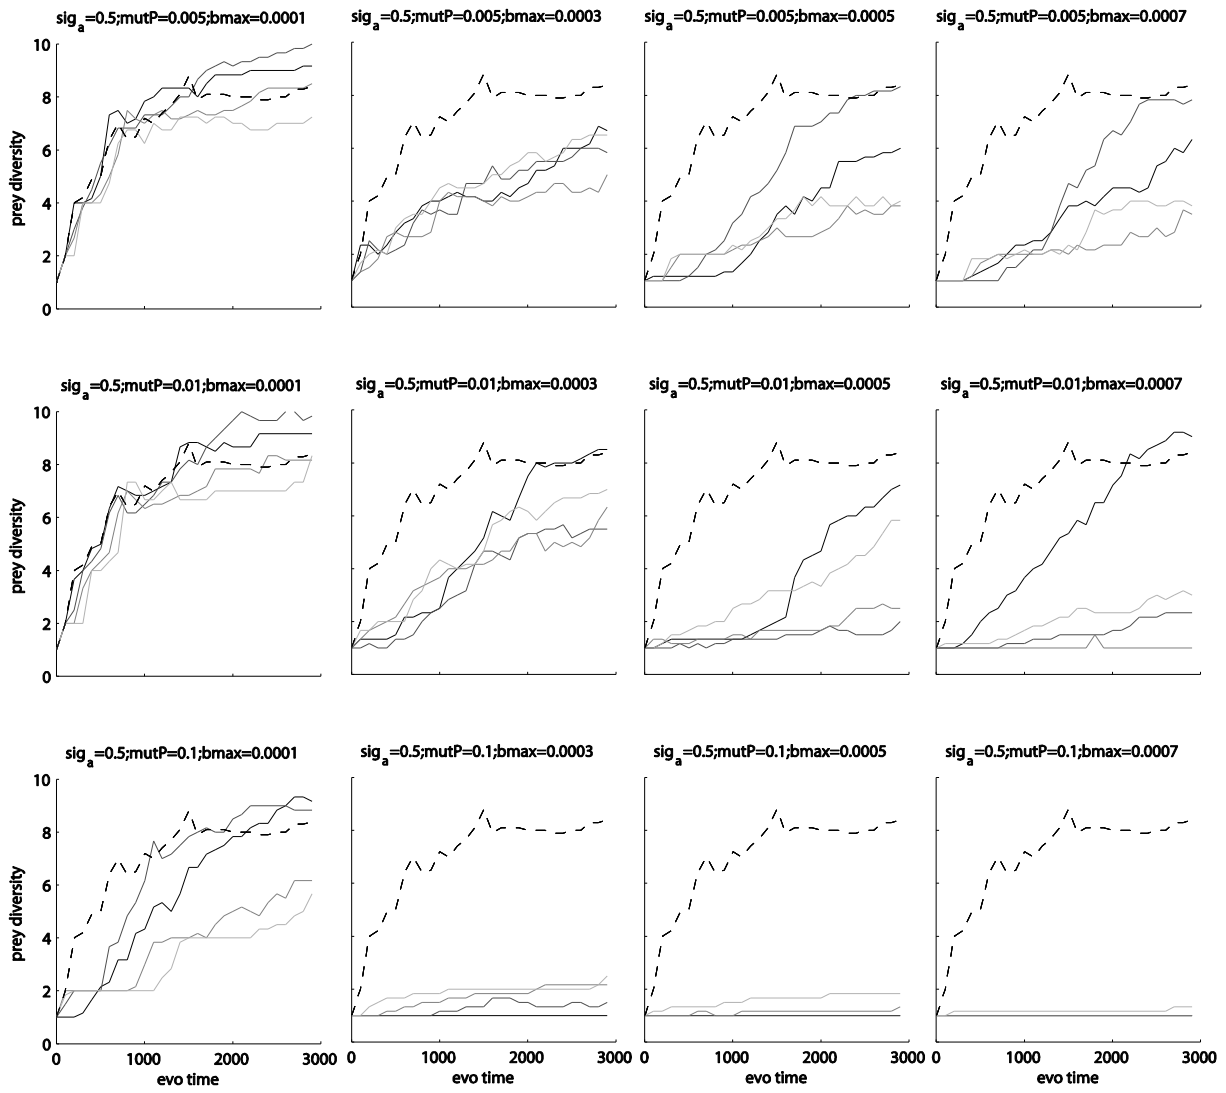

85

86

87 Figure S4

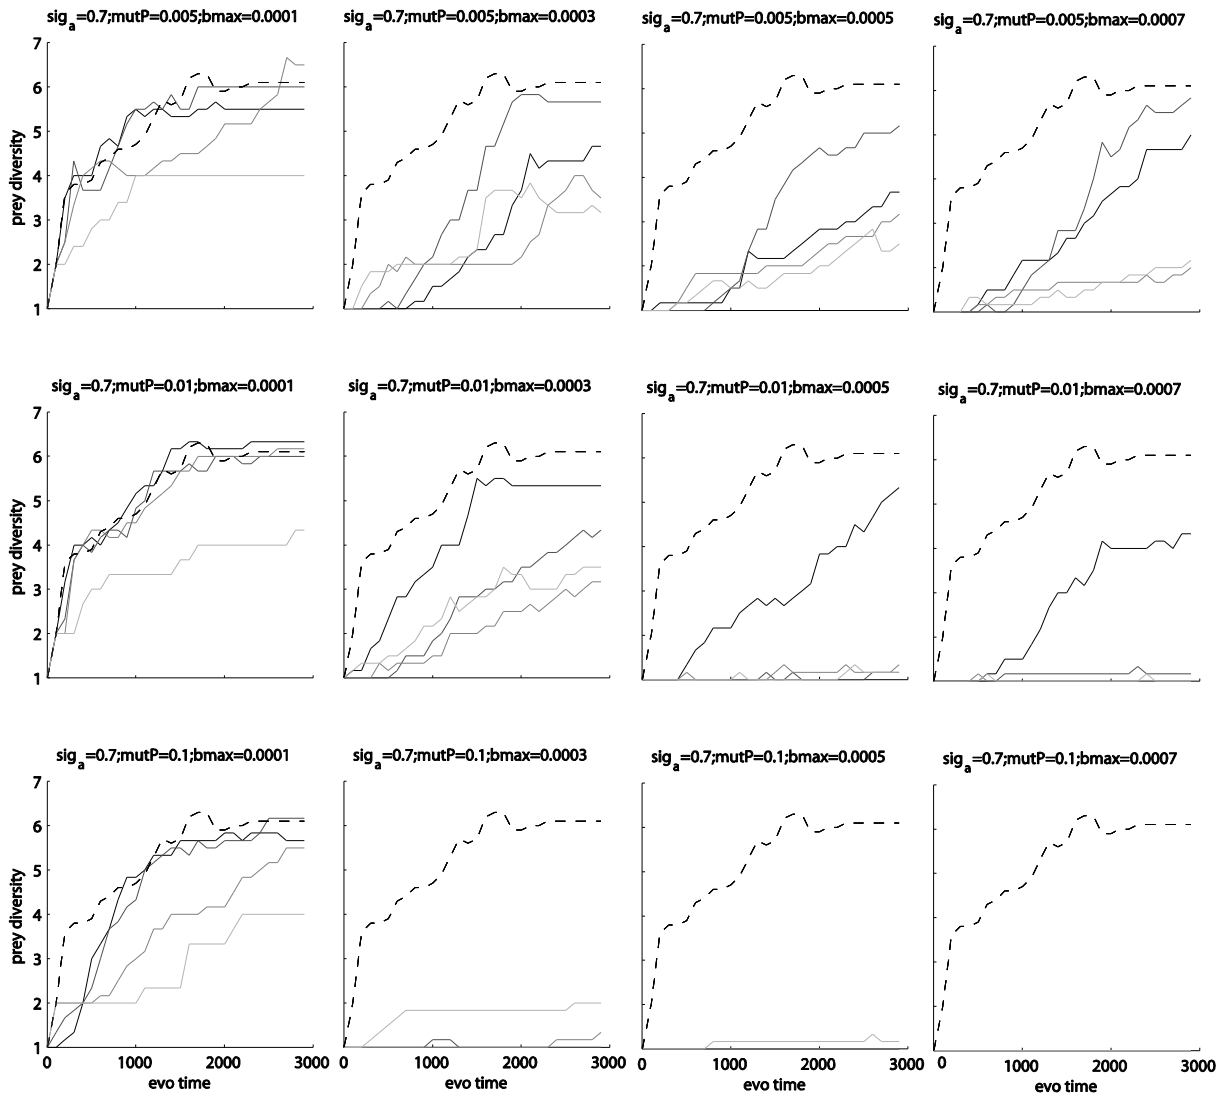

88

89

90



91 Figure S5

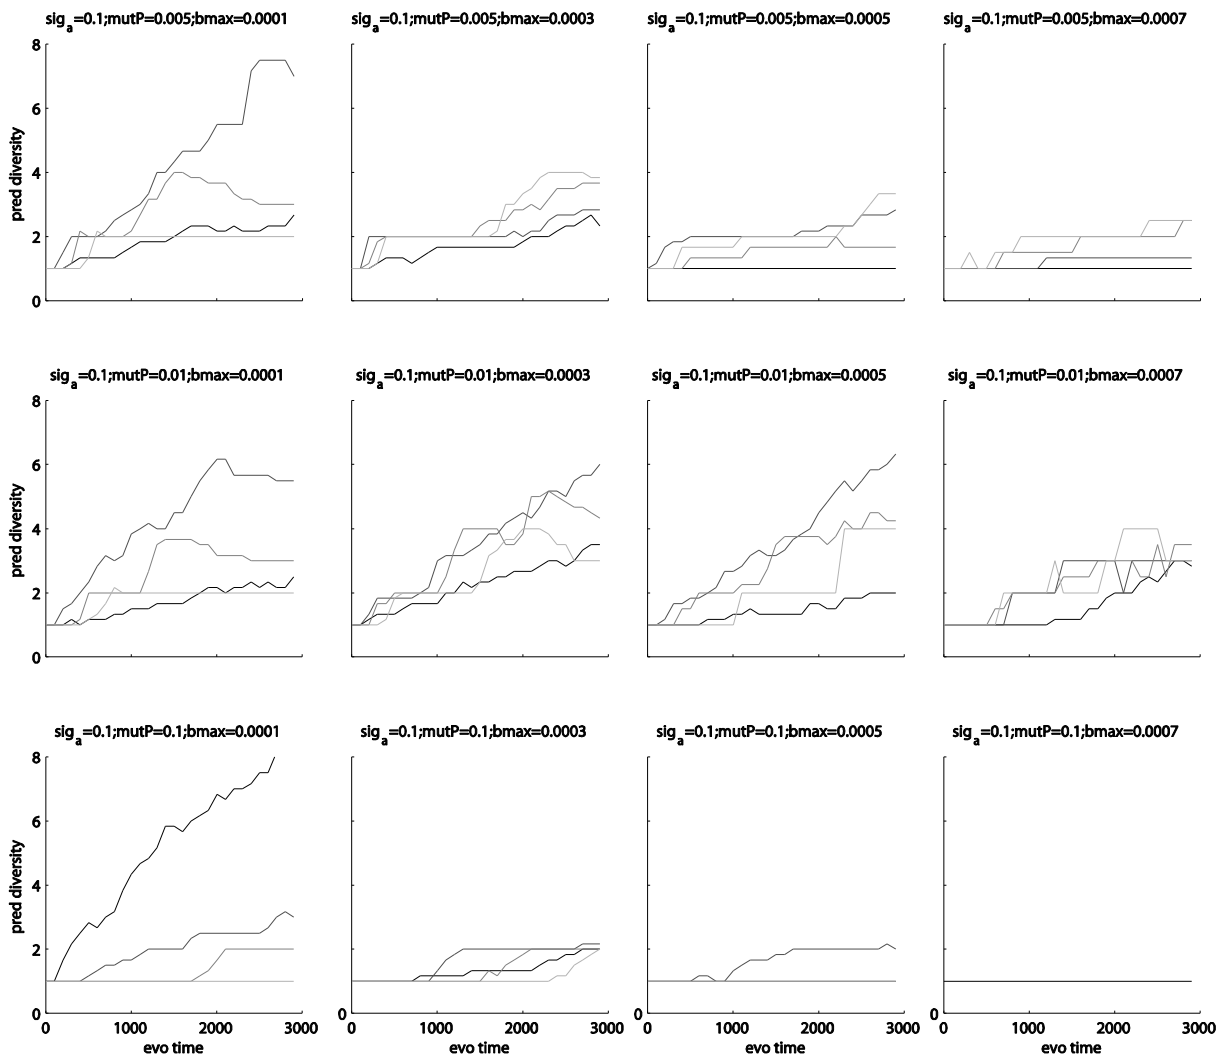

92

93

94 Figure S6

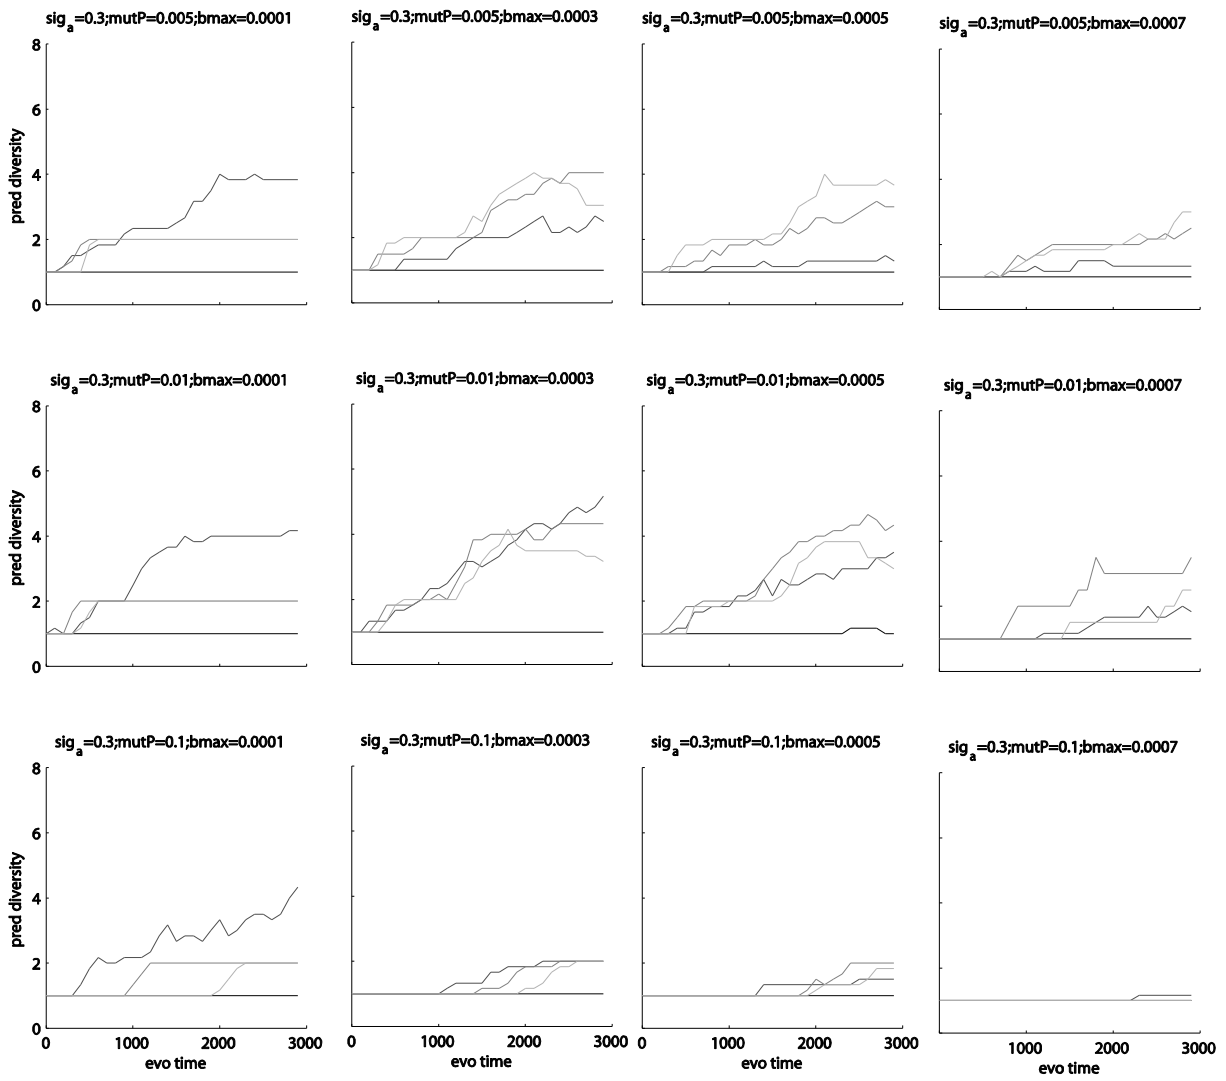

95

96

97 Figure S7

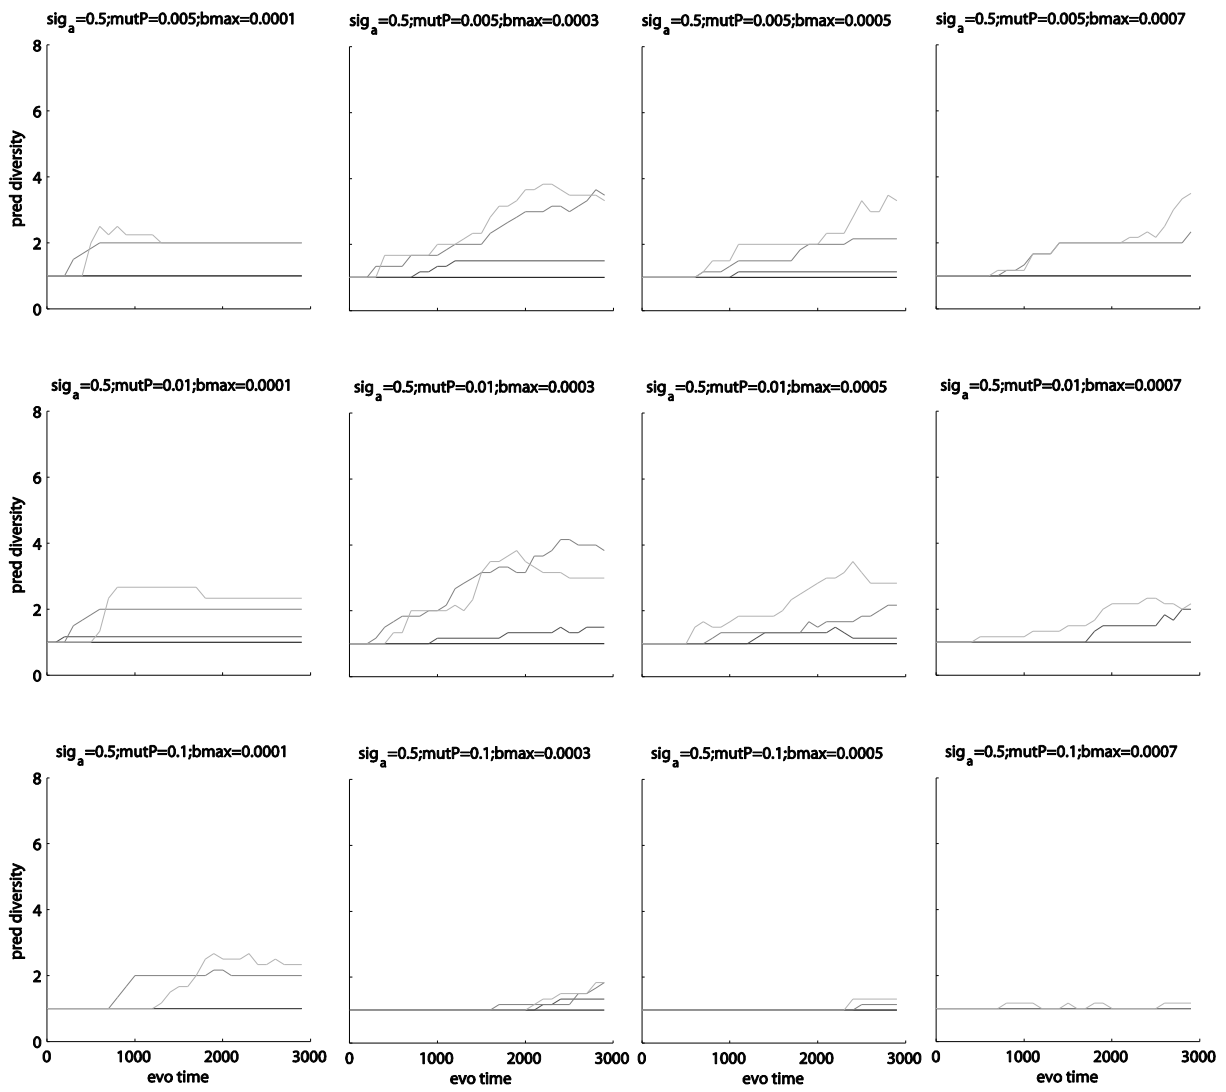

98

99

100 Figure S8

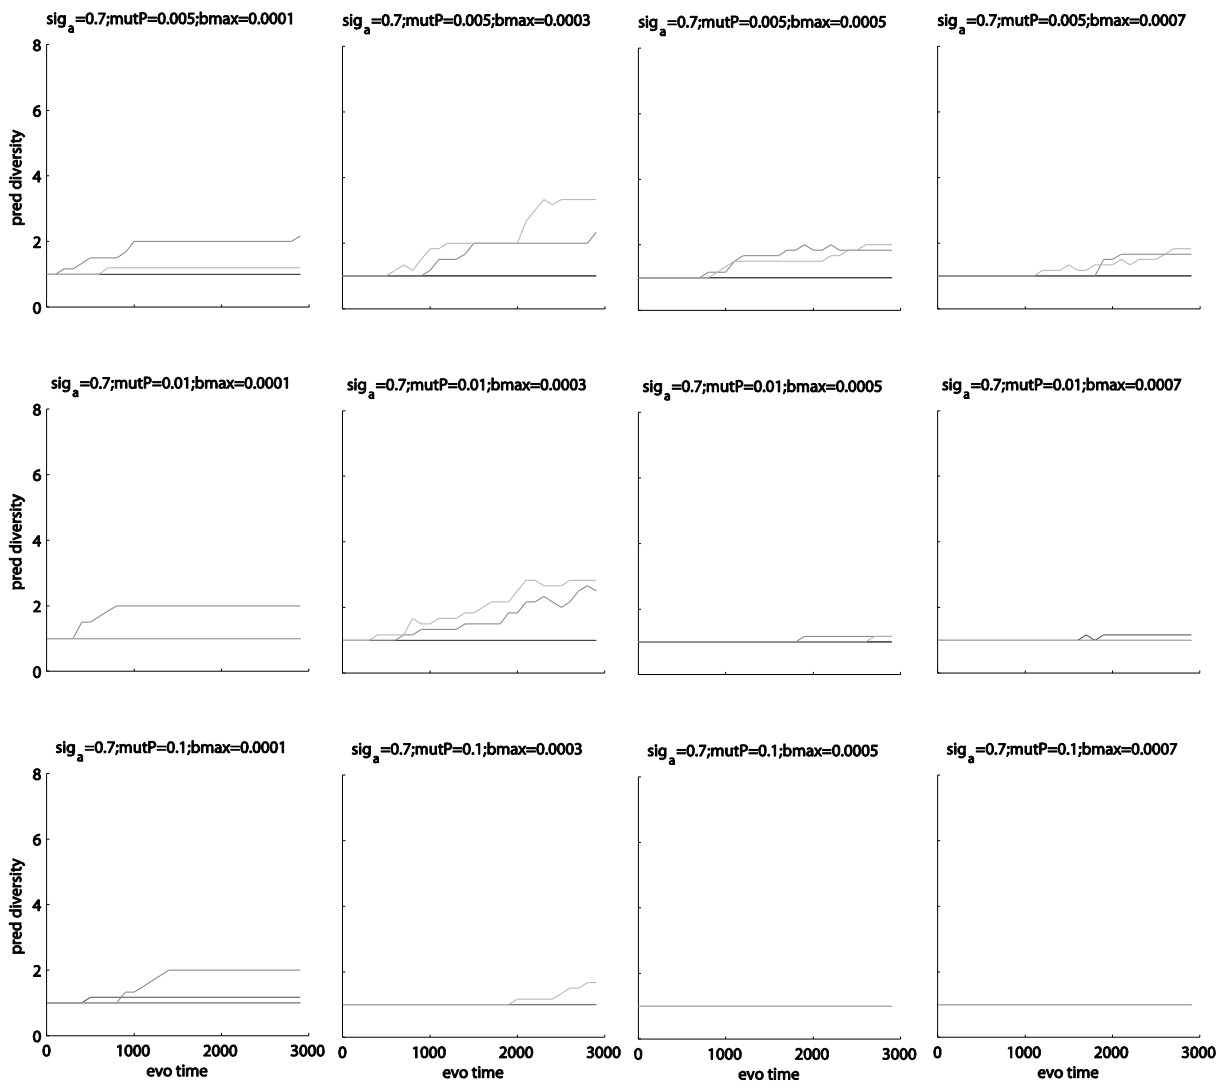

101

102

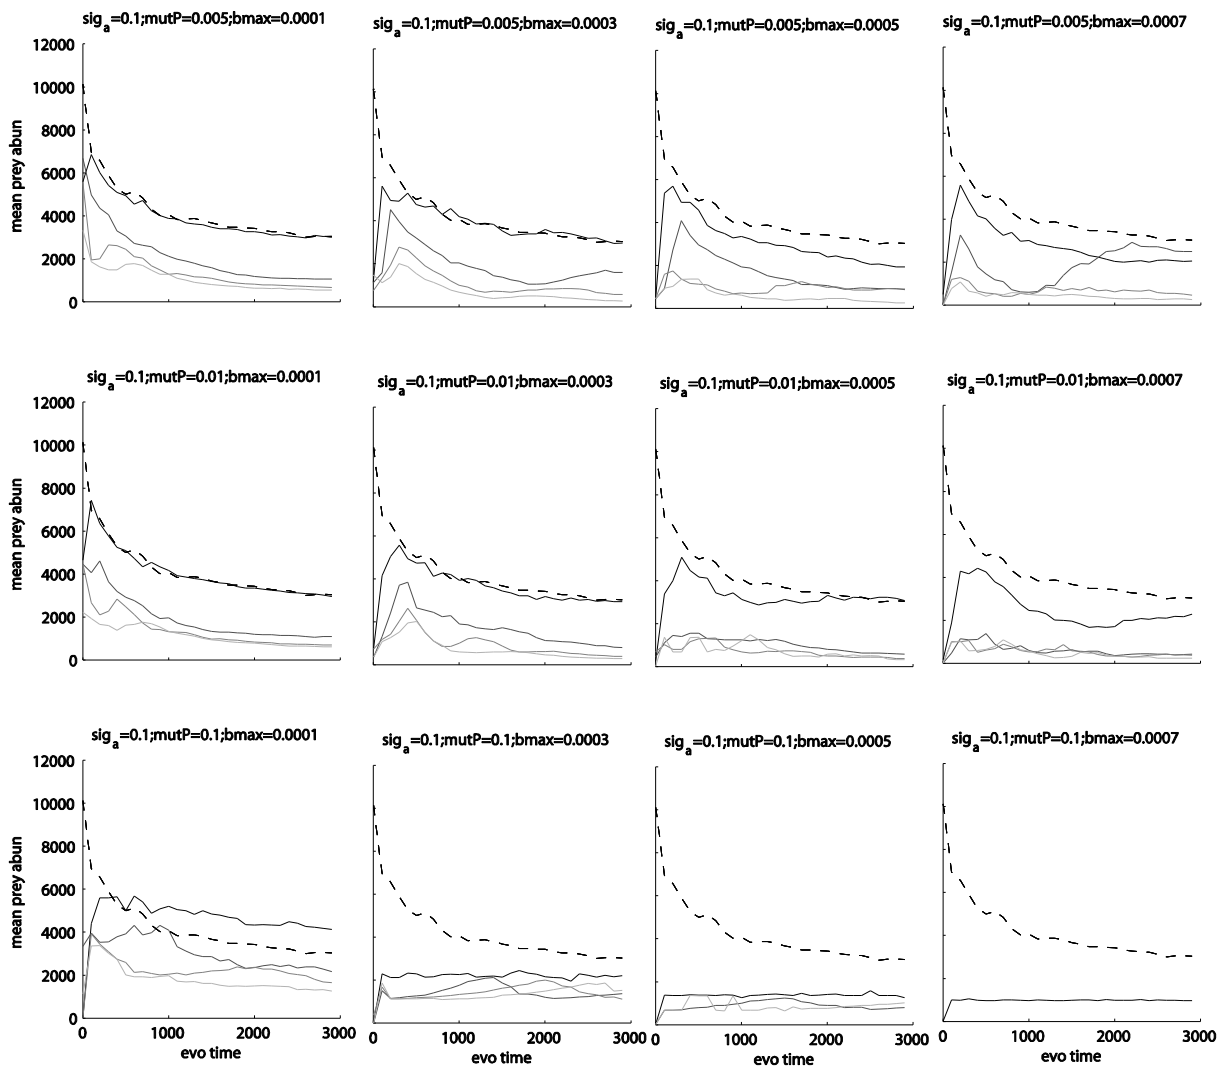

104

105

106 Figure S10

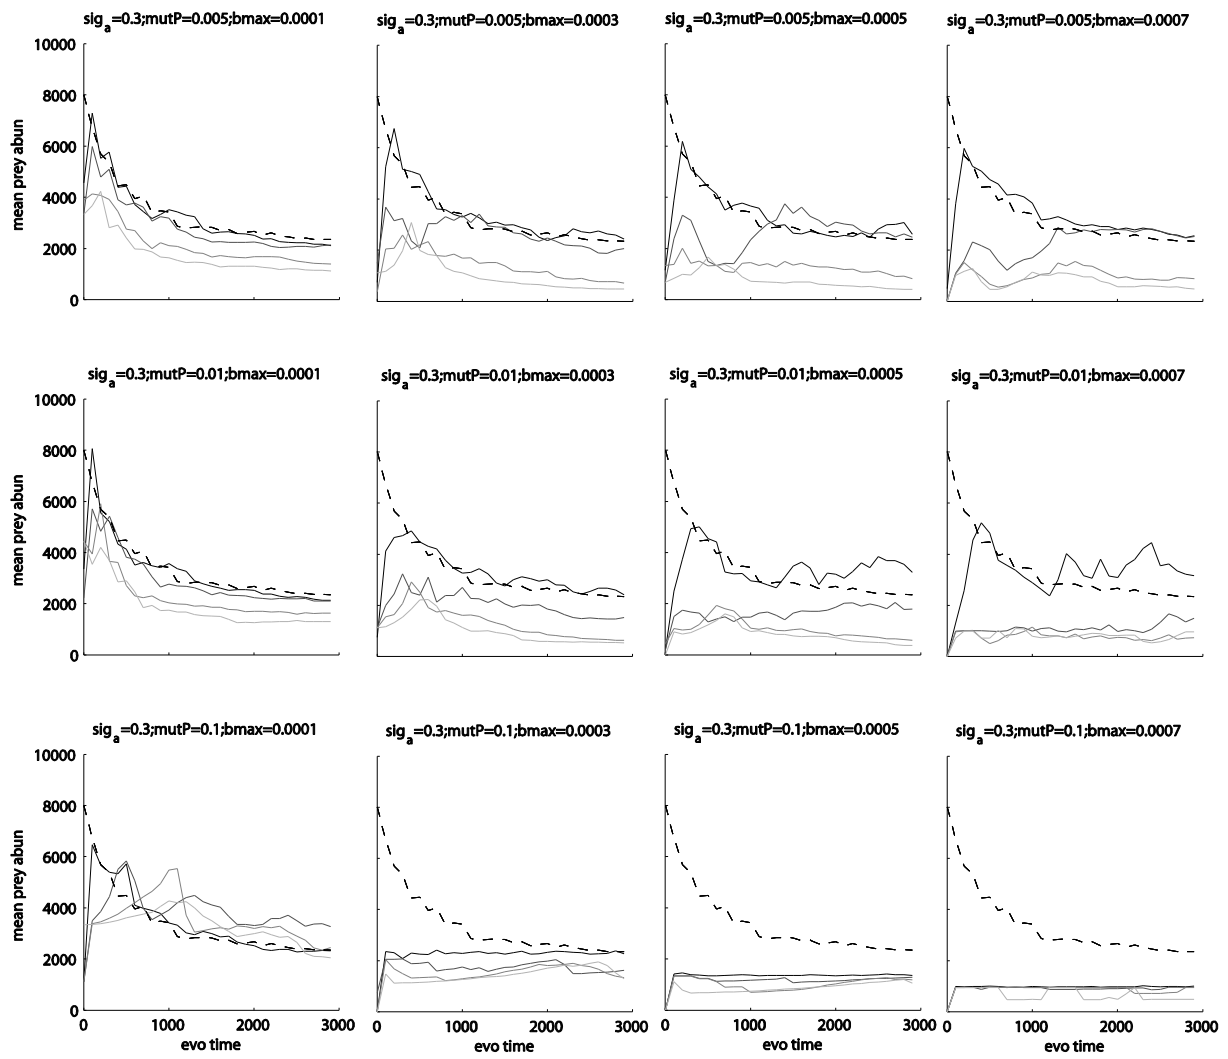

107

108

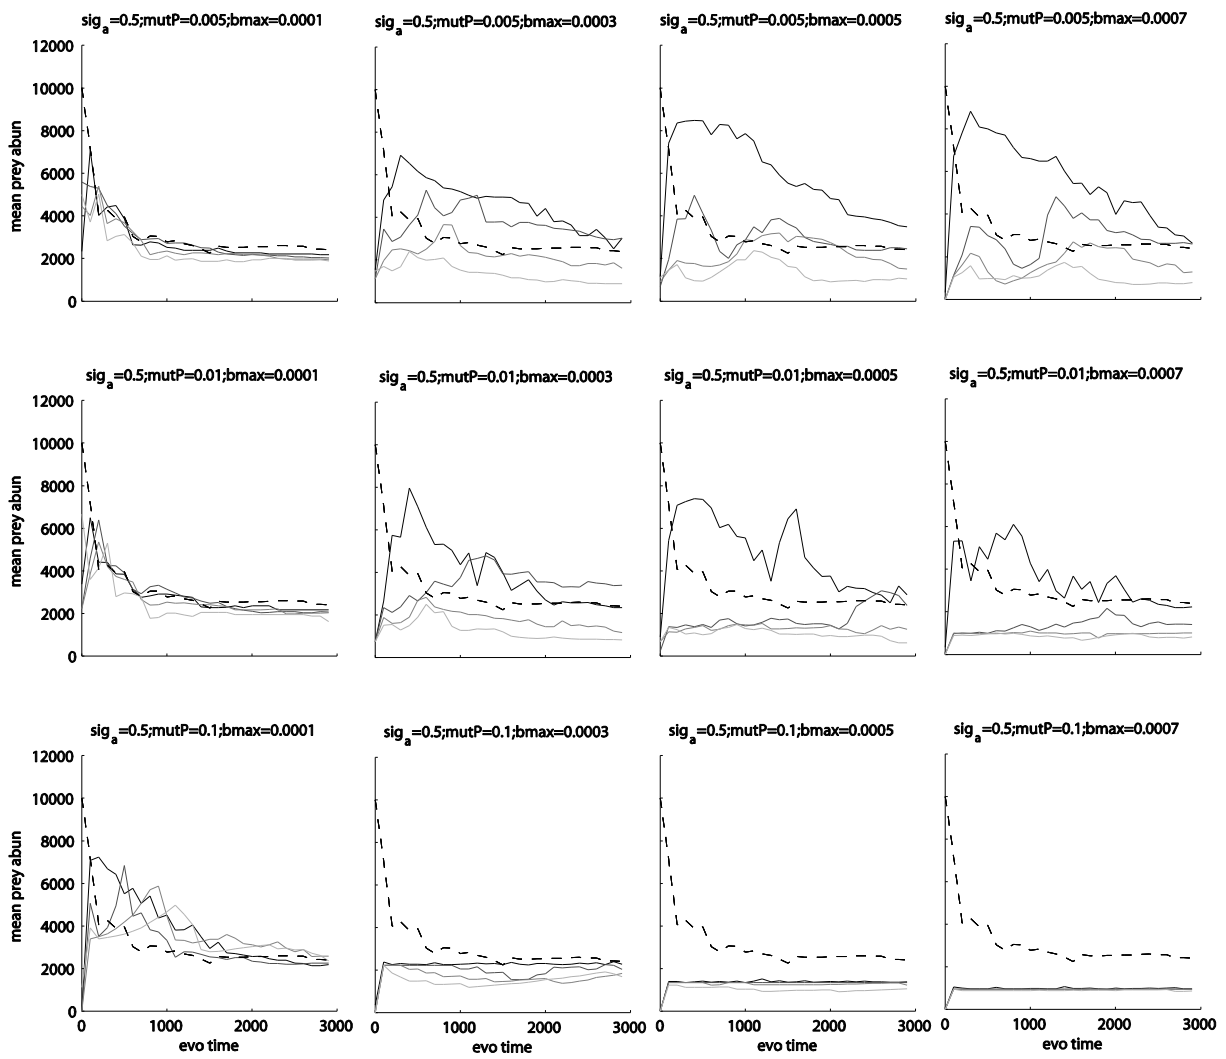

110

111

112 Figure S12

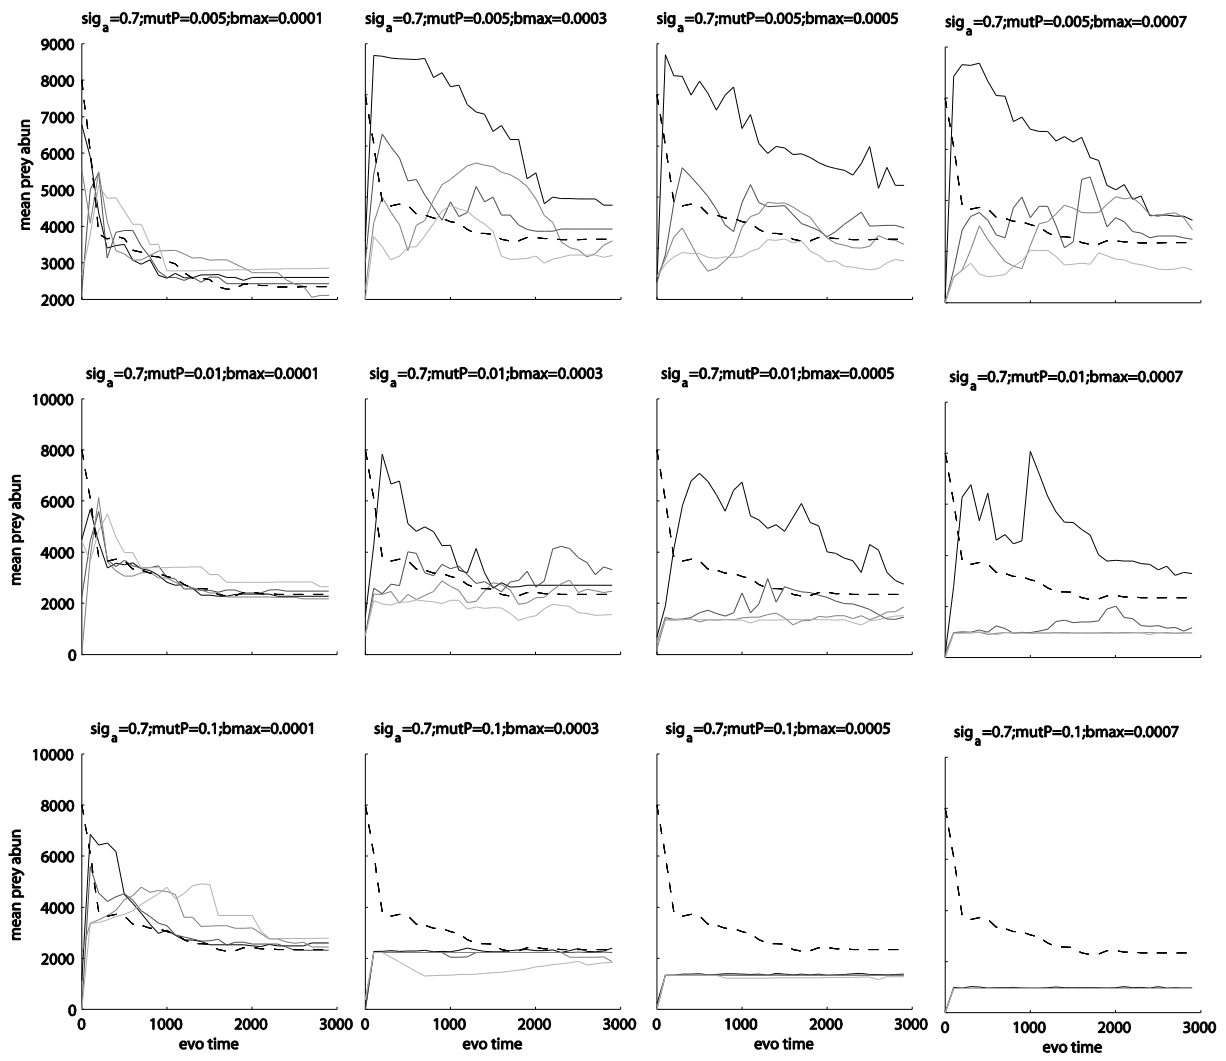

113

114



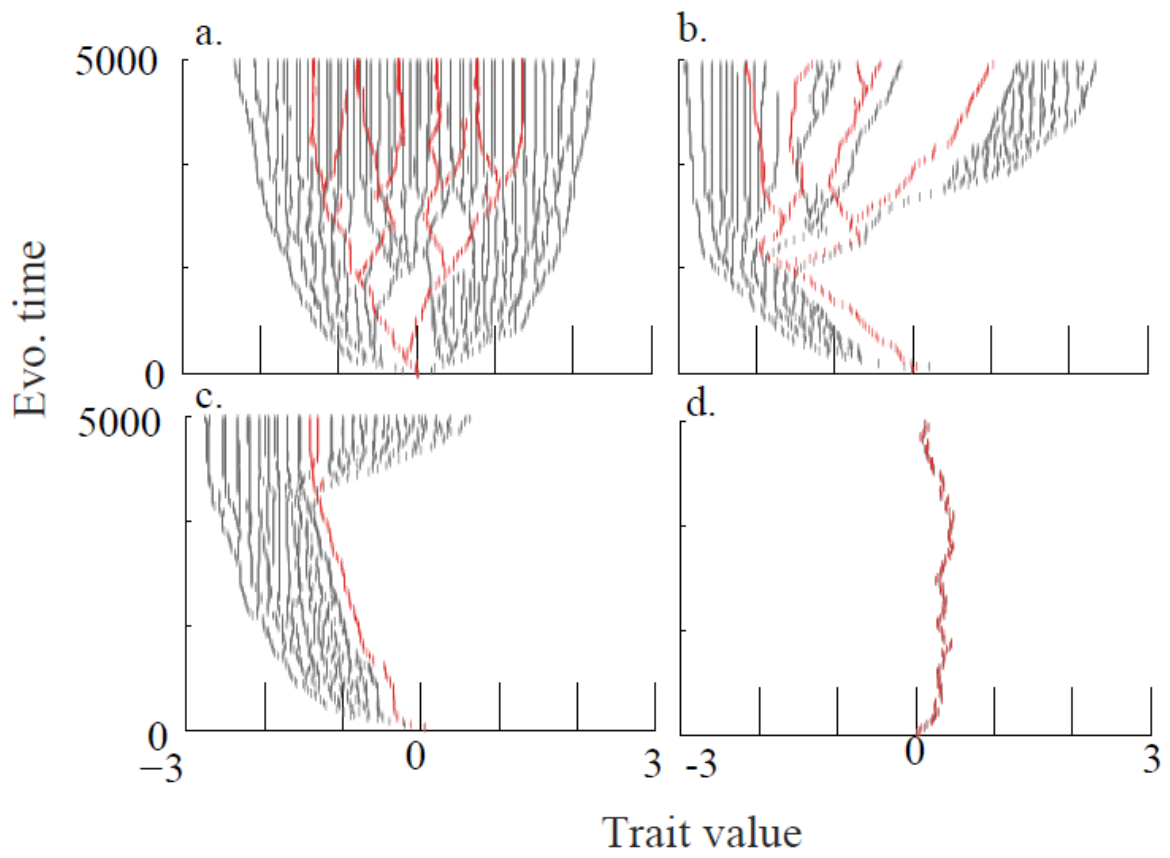

116

117

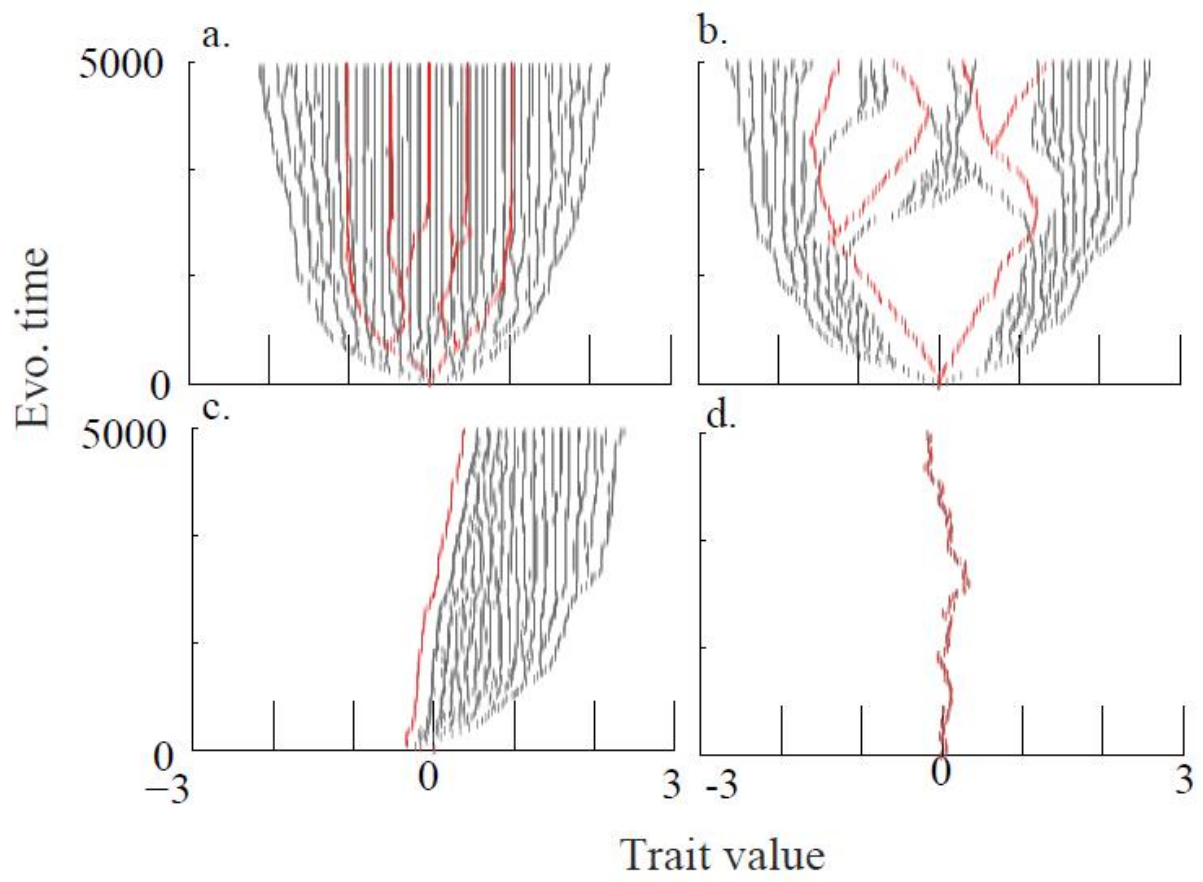

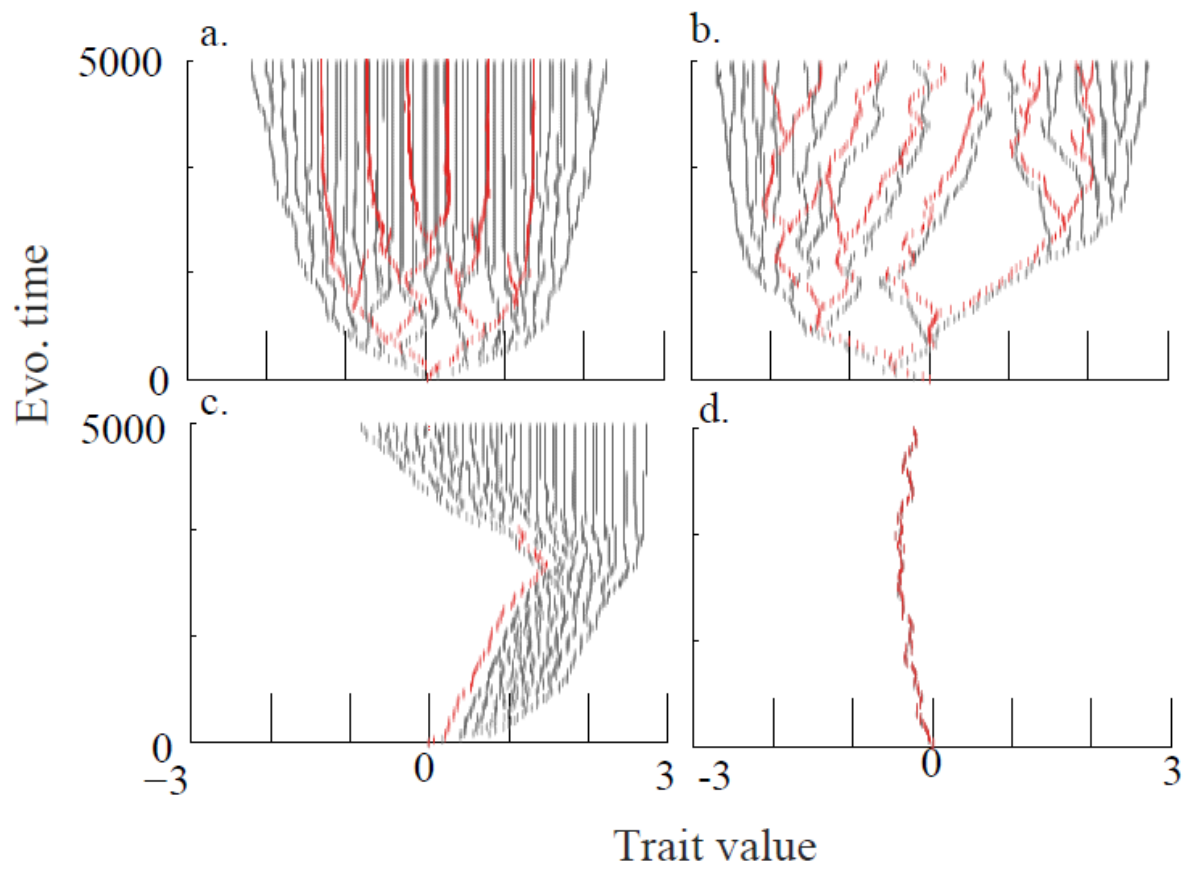

Supplement: rspb20172550supp1.pdf [file rspb20172550supp1.pdf]
